# Supplementary material
Source: PubMed Central journal article supplement (PMC2943341)
Supplement: NIHMS233508-supplement-Supplementary_Data_for_Table_1.pdf [file NIHMS233508-supplement-Supplementary_Data_for_Table_1.pdf]

Supplemental material: References to studies described in Table 1.

1. Aguilera M, Arias B, Wichers M, Barrantes-Vidal N, Moya J, Villa H, van Os J, Ibáñez MI, Ruipérez MA, Ortet G, Fañanás L: Early adversity and 5-HTT/BDNF genes: New evidence of gene x environment interactions on depressive symptoms in a general population. *Psychol Med.* 2009; 1-8
2. Araya R, Hu X, Heron J, Enoch M-A, Evans J, Lewis G, Nutt D, Goldman D: Effects of stressful life events, maternal depression and 5-HTTLPR genotype on emotional symptoms in pre-adolescent children. *Am J Med Genet.* 2009; 150B:670-682
3. Åslund C, Leppert J, Comasco E, Nordquist N, Orelund L, Nilsson K: Impact of the interaction between the 5HTTLPR polymorphism and maltreatment on adolescent depression: A population-based study. *Behav Genet.* 2009; 39:524-531
4. Benjet C, Thompson RJ, Gotlib IH: 5-HTTLPR moderates the effect of relational peer victimization on depressive symptoms in adolescent girls. *J Child Psychol Psychiatry.* 2010; 51:173-179
5. Brummert B, Boyle S, Siegler I, Kuhn C, Ashley-Koch A, Jonassaint C, Züchner S, Collins A, Williams R: Effects of environmental stress and gender on associations among symptoms of depression and the serotonin transporter gene linked polymorphic region (5-HTTLPR). *Behav Genet.* 2008; 38:34-43
6. Bukh JD, Bock C, Vinberg M, Werge T, Gether U, Vedel Kessing L: Interaction between genetic polymorphisms and stressful life events in first episode depression. *J Affect Disord.* 2009; E-Pub
7. Bull SJ, Huezo-Diaz P, Binder EB, Cubells JF, Ranjith G, Maddock C, Miyazaki C, Alexander N, Hotopf M, Cleare AJ, Norris S, Cassidy E, Aitchison KJ, Miller AH, Pariante CM: Functional polymorphisms in the interleukin-6 and serotonin transporter genes, and depression and fatigue induced by interferon-[alpha] and ribavirin treatment. *Mol Psychiatry* 2008; E-Pub
8. Caspi A, Sugden K, Moffitt TE, Taylor A, Craig IW, Harrington H, McClay J, Mill J, Martin J, Braithwaite A, Poulton R: Influence of life stress on depression: Moderation by a polymorphism in the 5-HTT gene. *Science.* 2003; 301:386-389
9. Cervilla JA, Molina E, Rivera M, Torres-Gonzalez F, Bellan JA, Moreno B, Luna JD, Lorente JA, Mayoral F, King M, Nazareth I, Gutiaerrez B: The risk for depression conferred by stressful life events is modified by variation at the serotonin transporter 5HTTLPR genotype: Evidence from the Spanish PREDICT-Gene cohort. *Mol Psychiatry.* 2007; 12:748-755
10. Chipman P, Jorm AF, Prior M, Sanson A, Smart D, Tan X, Easteal S: No interaction between the serotonin transporter polymorphism (5-HTTLPR) and childhood adversity or recent stressful life events on symptoms of depression: Results from two community surveys. *Am J Med Genet.* 2007; 144B:561-565
11. Chorbov VM, Lobos EA, Todorov AA, Heath AC, Botteron KN, Todd RD: Relationship of 5-HTTLPR genotypes and depression risk in the presence of trauma in a female twin sample. *Am J Med Genet.* 2007; 144B:830-833
12. Cicchetti D, Rogosch FA, Sturge-Apple ML: Interactions of child maltreatment and serotonin transporter and Monoamine Oxidase A polymorphisms: Depressive symptomatology among adolescents from low socioeconomic status backgrounds. *Dev Psychopathol.* 2007; 19:1161-1180
13. Dick DM, Plunkett JA, Hamlin DA, Nurnberger JC, Kuperman SD, Schuckit ME, Hesselbrock VF, Edenberg HG, Bierut LA: Association analyses of the serotonin transporter gene with lifetime depression and alcohol dependence in the Collaborative

- Study on the Genetics of Alcoholism (COGA) sample. *Psychiatr Genet.* 2007; 17:35-38
14. Eley TC, Sugden K, Corsico A, Gregory AM, Sham P, McGuffin P, Plomin R, Craig IW: Gene-environment interaction analysis of serotonin system markers with adolescent depression. *Mol Psychiatry.* 2004; 9:908
  15. Gillespie NA, Whitfield JB, Williams B, Heath AC, Martin NG: The relationship between stressful life events, the serotonin transporter (5-HTTLPR) genotype and major depression. *Psychol Med.* 2005; 35:101-111
  16. Goldman N: The serotonin transporter polymorphism (5-HTTLPR): Allelic variation and links with depressive symptoms. *Depress Anxiety.* In Press
  17. Grabe HJ, Lange M, Wolff B, Volzke H, Lucht M, Freyberger HJ, John U, Cascorbi I: Mental and physical distress is modulated by a polymorphism in the 5-HT transporter gene interacting with social stressors and chronic disease burden. *Mol Psychiatry.* 2005; 10:220
  18. Jacobs N, Kenis G, Peeters F, Derom C, Vlietinck R, van Os J: Stress-related negative affectivity and genetically altered serotonin transporter function: Evidence of synergism in shaping risk of depression. *Arch Gen Psychiatry.* 2006; 63:989-996
  19. Kaufman J, Yang BZ, Douglas-Palumberi H, Grasso D, Lipschitz D, Houshyar S, Krystal JH, Gelernter J: Brain-derived neurotrophic factor-5-HTTLPR gene interactions and environmental modifiers of depression in children. *Biol Psychiatry.* 2006; 59:673-680
  20. Kaufman J, Yang BZ, Douglas-Palumberi H, Houshyar S, Lipschitz D, Krystal JH, Gelernter J: Social supports and serotonin transporter gene moderate depression in maltreated children. *Proc Natl Acad Sci U S A.* 2004; 101:17316-17321
  21. Kendler KS, Kuhn JW, Vittum J, Prescott CA, Riley B: The interaction of stressful life events and a serotonin transporter polymorphism in the prediction of episodes of major depression: A replication. *Arch Gen Psychiatry.* 2005; 62:529-535
  22. Kilpatrick DG, Koenen KC, Ruggiero KJ, Acierno R, Galea S, Resnick HS, Roitzsch J, Boyle J, Gelernter J: The serotonin transporter genotype and social support and moderation of posttraumatic stress disorder and depression in hurricane-exposed adults. *Am J Psychiatry.* 2007; 164:1693-1699
  23. Kim JM, Stewart R, Kim SW, Yang SJ, Shin IS, Kim YH, Yoon JS: Interactions between life stressors and susceptibility genes (5-HTTLPR and BDNF) on depression in Korean elders. *Biol Psychiatry.* 2007; 62:423-428
  24. Kraus MR, Al-Taie O, Schäfer A, Pfersdorff M, Lesch KP, Scheurlen M: Serotonin-1A receptor gene HTR1A variation predicts interferon-induced depression in chronic hepatitis C. *Gastroenterology* 2007; 132:1279-1286
  25. Kumsta R, Stevens S, Brookes K, Schlotz W, Castle J, Beckett C, Kreppner J, Rutter M, Sonuga-Barke E: 5HTT genotype moderates the influence of early institutional deprivation on emotional problems in adolescence: evidence from the English and Romanian Adoptee (ERA) study. *J Child Psychol Psychiatry* (in press)
  26. Laucht M, Treutlein J, Blomeyer D, Buchmann AF, Schmid B, Becker K, Zimmermann US, Schmidt MH, Esser G, Rietschel M, Banaschewski T: Interaction between the 5-HTTLPR serotonin transporter polymorphism and environmental adversity for mood and anxiety psychopathology: Evidence from a high-risk community sample of young adults. *Int J Neuropsychopharmacol.* 2009; 12:737-747
  27. Lazary J, Aron L, Xenia G, Anita B, Eszter M, Gabriella J, Gyorgy B: New evidence for the association of the serotonin transporter gene (SLC6A4) haplotypes, threatening life events, and depressive phenotype. *Biol Psychiatry.* 2008; 64:498-504
  28. Lenze EJ, Munin MC, Ferrell RE, Pollock BG, Skidmore E, Lotrich F, Rogers JC, Quear T, Houck P, Reynolds CF: Association of the serotonin transporter gene-linked

- polymorphic region (5-HTTLPR) genotype with depression in elderly persons after hip fracture. *Am J Geriatr Psychiatry*. 2005; 13:428-432
29. Lotrich FE, Ferrell RE, Rabinovitz M, Pollock BG: Risk for depression during interferon-alpha treatment is affected by the serotonin transporter polymorphism. *Biol Psychiatry* 2009; 65:344-348
30. Mandelli L, Serretti A, Marino E, Pirovano A, Calati R, Colombo C: Interaction between serotonin transporter gene, catechol-O-methyltransferase gene and stressful life events in mood disorders. *Int J Neuropsychopharmacol*. 2007; 10:437-447
31. McCaffery JM, Duan QL, Frasure-Smith N, Barhdadi A, Lespérance F, Théroux P, Rouleau GA, Dubé MP: Genetic predictors of depressive symptoms in cardiac patients. *Am J Med Genet*. 2009; 150B:381-388
32. Mossner R, Henneberg A, Schmitt A, Syagailo YV, Grassle M, Hennig T, Simantov R, Gerlach M, Riederer P, Lesch KP: Allelic variation of serotonin transporter expression is associated with depression in Parkinson's disease. *Mol Psychiatry*. 2001; 6:350-352
33. Nakatani D, Sato H, Sakata Y, Shiotani I, Kinjo K, Mizuno H, Shimizu M, Ito H, Koretsune Y, Hirayama A, Hori M: Influence of serotonin transporter gene polymorphism on depressive symptoms and new cardiac events after acute myocardial infarction. *Am Heart J*. 2005; 150:652-658
34. Otte C, McCaffery J, Ali S, Whooley MA: Association of a serotonin transporter polymorphism (5-HTTLPR) with depression, perceived stress, and norepinephrine in patients with coronary disease: The heart and soul study. *Am J Psychiatry*. 2007; 164:1379-1384
35. Power T, Stewart R, Ancelin ML, Jaussent I, Malafosse A, Ritchie K: 5-HTTLPR genotype, stressful life events and late-life depression: No evidence of interaction in a French population. *Neurobiol Aging*. 2008; E-Pub
36. Ramasubbu R, Tobias R, Buchan AM, Bech-Hansen NT: Serotonin transporter gene promoter region polymorphism associated with poststroke major depression. *J Neuropsychiatry Clin Neurosci*. 2006; 18:96-99
37. Scheid JM, Holzman CB, Jones N, Friderici KH, Nummy KA, Symonds LL, Sikorskii A, Regier MK, Fisher R: Depressive symptoms in mid-pregnancy, lifetime stressors and the 5-HTTLPR genotype. *Genes, Brain & Behavior*. 2007; 6:453-464
38. Sjöberg RL, Nilsson KW, Nordquist N, Åhrvik J, Leppert J, Lindstram L, Oreland L: Development of depression: Sex and the interaction between environment and a promoter polymorphism of the serotonin transporter gene. *Int J Neuropsychopharmacol*. 2006; 9:443-449
39. Sudgen K, Arseneault L, Harrington H, Moffitt TE, Williams B, Caspi A: The serotonin transporter gene moderates the development of emotional problems among children following bullying victimization. *In Press. J Am Ac Child Adolsc Psychiatry*
40. Surtees PG, Wainwright NW, Willis-Owen SA, Luben R, Day NE, Flint J: Social adversity, the serotonin transporter (5-HTTLPR) polymorphism and major depressive disorder. *Biol Psychiatry*. 2006; 59:224-229
41. Taylor SE, Way BM, Welch WT, Hilmert CJ, Lehman BJ, Eisenberger NI: Early family environment, current adversity, the serotonin transporter promoter polymorphism, and depressive symptomatology. *Biol Psychiatry*. 2006; 60:671-676
42. Wichers M, Kenis G, Jacobs N, Mengelers R, Derom C, Vlietinck R, van Os J: The BDNF ValMet • 5-HTTLPR • child adversity interaction and depressive symptoms: An attempt at replication. *Am J Med Genet*. 2008; 147B:120-123
43. Wilhelm K, Mitchell PB, Niven H, Finch A, Wedgwood L, Scimone A, Blair IP,

Parker G, Schofield PR: Life events, first depression onset and the serotonin transporter gene. *Br J Psychiatry*. 2006; 188:210-215

44. Zalsman G, Huang YY, Oquendo MA, Burke AK, Hu XZ, Brent DA, Ellis SP, Goldman D, Mann JJ: Association of a triallelic serotonin transporter gene promoter region (5-HTTLPR) polymorphism with stressful life events and severity of depression. *Am J Psychiatry*. 2006; 163:1588-1593

45. Zhang K, Xu Q, Xu Y, Yang H, Luo J, Sun Y, Sun N, Wang S, Shen Y: The combined effects of the 5-HTTLPR and 5-HTR1A genes modulates the relationship between negative life events and major depressive disorder in a Chinese population. *J Affect Disord*. 2009; 114:224-231
